# Supplementary material for: Cascade signal amplification using Hg2+-induced oxidation of silver nanoparticles and cation exchange reaction for ICP-MS bioassay
Source: Royal Society of Chemistry journal article supplement (doi:10.1039/d3cc05121h), 2023-01-01
Supplement: d3cc05121h1.pdf [file d3cc05121h1.pdf]

## Electronic Supplementary Information

### **Cascade signal amplification using Hg<sup>2+</sup>-induced oxidation of silver nanoparticles and cation exchange reaction for ICP-MS bioassay**

Yujing He,<sup>a</sup> Jing Hu,<sup>b</sup> Yunfei Tian<sup>b\*</sup> and Xiandeng Hou<sup>\*a, b</sup>

<sup>a</sup> *College of Chemistry, Sichuan University, Chengdu, Sichuan 610064, China.*

<sup>b</sup> *Analytical & Testing Centre, Sichuan University, Chengdu, Sichuan 610064, China;*

\*To whom correspondence should be addressed. E-mails: [houxd@scu.edu.cn](mailto:houx@scu.edu.cn);  
[tianyunfei@scu.edu.cn](mailto:tianyunfei@scu.edu.cn)

## Experimental section

### Reagents and Chemicals

Deionized water (DIW, 18.2 M $\Omega$  cm) was obtained from a water purification system (PCUJ-10, Sichuan Ultrapure Technology Co., Ltd, Chengdu, China). All oligonucleotides (Table S1) used in this work were purchased from Sangon Biotechnology Co., Ltd (Shanghai, China). High purity trisodium citrate, NaBH<sub>4</sub>, AgNO<sub>3</sub>, CuCl<sub>2</sub>, Na<sub>2</sub>S, starch and HNO<sub>3</sub> were obtained from Chron Chemicals (Chengdu, China). Hg(NO<sub>3</sub>)<sub>2</sub> was ordered from Lixiang Mercury Industry Co., Ltd (Guizhou, China). Myoglobin (MYO) and mucin were acquired from Diamond (Shanghai, China). Hemoglobin (HEMO) was ordered from Sigma Aldrich (Shanghai, China). Immunoglobulin G (IgG), transferrin (TRF) and human serum albumin (HSA) were obtained from Bioss Biotechnology Co., Ltd (Beijing, China). CEA was purchased from Cell to Antibody & Antigen Biotech. Co., Ltd (Zhengzhou, China). Human serum samples were provided by the West China Hospital, Sichuan University (Chengdu, China). All working solutions were prepared with HEPES buffer (10 mM, pH 7.4).

**Table S1** Sequences of oligonucleotides used in this work

| Name                   | Sequence (5'-3')                                 |
|------------------------|--------------------------------------------------|
| Probe1-DNA             | TTTTTTTACCACATCATCCATATAACTGAAAGCCAATTTTTT       |
| Target DNA (HBV-DNA)   | TTGGCTTTCAGTTATATGGATGATGTGGTA                   |
| Single-base mismatched | TTGGCTTTCAGTTATAT <u>T</u> GATGATGTGGTA          |
| Two-base mismatched    | TTGGCTTTC <u>T</u> GTTATATGGAT <u>C</u> ATGTGGTA |
| Probe2-CEA             | CTTTTTTATAACCAGCTTATTCAATTTTTTTTG                |

## Instruments

An iCAP Q inductively coupled plasma mass spectrometer (Thermo Fisher Scientific Inc., Germany) was used for detection of  $^{63}\text{Cu}$  throughout this work, with the operational parameters listed in Table S2. Ultraviolet visible absorption spectra were recorded on a UH-5300 UV-vis spectrophotometer (Hitachi, Japan). TEM characterization of Ag NPs and CuS NPs was performed with a Tecnai G2 F20 S-TWIN transmission electron microscope at an accelerating voltage of 200 kV (FEI Co., USA). X-ray diffraction (XRD) patterns were recorded with an X-ray diffractometer (EMPYREAN, Panalytical Inc., Netherlands). The X-ray photoelectron spectra (XPS) was collected with an AXIS Ultra DLD spectrometer (Kratos, UK). Zeta potentials were determined using a Zetasizer Nano ZS (Malvern Instruments, UK). Ultracentrifuge filters (3 and 100 kDa cutoff, 0.5 mL) were purchased from Merck Millipore (Darmstadt, Germany). A H1750R-model centrifuge (Cence Instrument Co., Ltd, Changsha, China) was used for the pretreatment of serum samples. Nylon 66 and polyethersulfone filtration membranes (0.22  $\mu\text{m}$ ) were purchased from Tianjin Jinteng Experiment Equipment Co., Ltd (Tianjin, China).

**Table S2** Operating parameters of ICP-MS

| Parameters         | Value                   |
|--------------------|-------------------------|
| RF power           | 1548 W                  |
| Detector voltage   | 1520 V                  |
| Dwell time         | 0.01 s                  |
| Nebulizer gas flow | 1.0 L min <sup>-1</sup> |
| Auxiliary gas flow | 0.8 L min <sup>-1</sup> |
| Cool gas flow      | 14 L min <sup>-1</sup>  |
| Isotope monitored  | $^{63}\text{Cu}$        |

## Synthesis

**Synthesis of Ag NPs.** Ag NPs were prepared based on chemical reduction method according to the literature.<sup>1</sup> Briefly, 5 mL of 1.25 mM silver nitrate was added dropwise to the chilled mixture of 2.0 mM sodium borohydride (15 mL, used as a reducing agent) and 2.5 mM trisodium citrate (2 mL, used as a stabilizing agent) under vigorous stirring at room temperature. The solution turned from pale yellow to bright yellow as silver nitrate was dropped in. After stirring for 30 min, the synthesis was ceased and the prepared Ag NPs were isolated from the mixture by ultracentrifugation (3 kDa cutoff). The precipitate was redispersed in DIW and stored for use in this work.

**Synthesis of CuS NPs.** CuS NPs were prepared according to the literature with slight modification.<sup>2</sup> Briefly, 4 g of starch was added to 500 mL DIW which was heated to 70-80°C under stirring for 15 min, to prepare a transparent starch solution. Then, 1.344 g CuCl<sub>2</sub> and 0.78 g Na<sub>2</sub>S were dissolved separately in 200 mL of hot starch solution. The resultant CuCl<sub>2</sub> and Na<sub>2</sub>S solutions were maintained at 70°C under vigorous stirring for 5 min. Thereafter, the hot Na<sub>2</sub>S-starch solution was added dropwise to the hot CuCl<sub>2</sub>-starch solution under vigorous stirring. The mixture was allowed to react for 30 min at 70°C and then cooled to room temperature. The formed dark green product was collected by centrifugation, washed three times with DIW and dried at 60 °C for 7 h. Finally, the as-prepared CuS NPs were resuspended in DIW for further characterization and use in this work.

## Analytical procedure

For the detection of HBV DNA and CEA, 40 µL of 1 µM probe1-DNA (or probe2-CEA) was mixed with 48 µL of 5 µM Hg<sup>2+</sup> in 200 µL of HEPES buffer (10 mM, pH 7.4) at room temperature for 1.5 h to form the T-Hg-T hairpin structure. Then, different concentrations of target HBV DNA or CEA (50 µL) as well as 32 µL of Ag NPs solution were added to the mixture, the reaction lasted for 45 min to accomplish the oxidation of Ag NPs. Then, 50 µL of CuS NPs solution was added to initiate the cation exchange reaction. After reacting for 15 min at room temperature, the mixture was passed through a Nylon 66 microfiltration membrane (0.22 µm) to separate CuS NPs and ionic Cu<sup>2+</sup>, 50 µL of the filtrate was diluted to 5 mL with 2% (v/v) HNO<sub>3</sub> followed by ICP-MS detection of the Cu<sup>2+</sup> ions.

## Pretreatment of human serum samples

Human serum samples were donated by the West China Hospital of Sichuan University. 400 µL of the serum sample was firstly placed into an ultrafiltration tube (0.5 mL, 100 kDa cutoff) and then centrifuged at 8000 rpm for 10 min. The filtrate was quantitatively transferred to a clean centrifuge tube before a further 100-fold dilution with pure water.

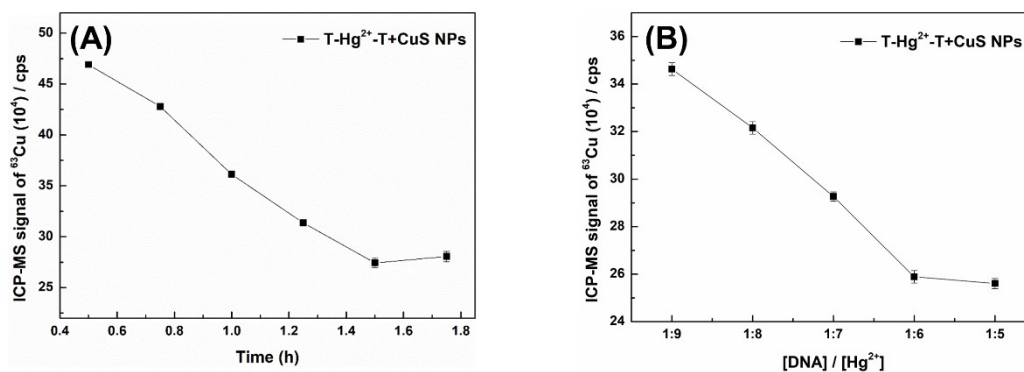

**Fig. S1** Optimization of the formation of T-Hg<sup>2+</sup>-T hairpin. Effect of (A) incubation time and (B) molar ratios of probe1-DNA and Hg<sup>2+</sup>. CuS NPs were added to indicate the residual Hg<sup>2+</sup> ions in solution.

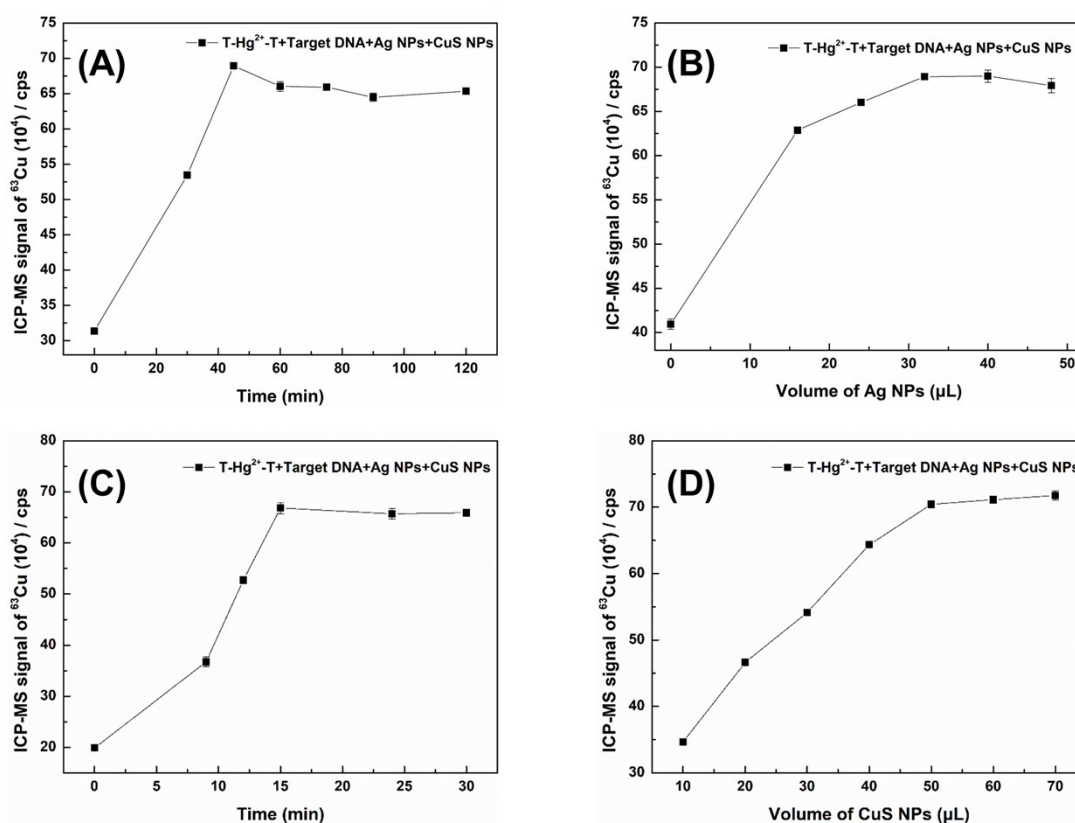

**Fig. S2** Optimization of the cascade reaction conditions. Effect of (A) incubation time and (B) dosage of Ag NPs on the reaction between Hg<sup>2+</sup> and Ag NPs. Effect of (C) incubation time and (D) dosage of CuS NPs on the reaction between Ag<sup>+</sup> and CuS NPs. The concentration of HBV DNA was remained at 10 pM and the total volume of the reaction solution was fixed at 370 μL so that the optimization of the dosage of Ag NPs and CuS NPs was carried out by adding different volume of our prepared Ag NPs and CuS NPs solutions.

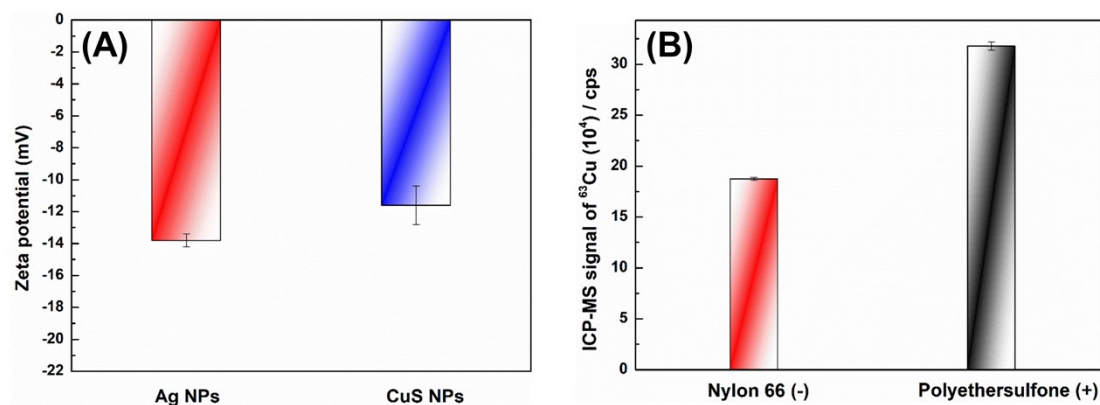

**Fig. S3** (A) Zeta-potentials of the prepared Ag NPs and CuS NPs. (B) ICP-MS signal of CuS NPs filtered by different filtration membranes.

**Table S3** Comparison of LODs with other methods for the detection of nucleic acids

| Method       | Signal amplification strategy                                                  | LOD      | Reference |
|--------------|--------------------------------------------------------------------------------|----------|-----------|
| Colorimetric | Rolling circle amplification (RCA)                                             | 3.3 pM   | 3         |
| Fluorescent  | Entropy-driven catalysis (EDC)+ catalytic hairpin assembly (CHA)               | 15.6 fM  | 4         |
| Fluorescent  | Exonuclease III-assisted signal amplification                                  | 15 pM    | 5         |
| Fluorescent  | Strand displacement reaction (SDR)+ cation exchange reaction (CER)             | 25 fM    | 6         |
| SP-ICPMS     | Hybridization chain reaction (HCR)                                             | 3 fM     | 7         |
| ICP-MS       | Double-strand DNA templated Cu NPs                                             | 4 pM     | 8         |
| ICP-MS       | MNAzyme amplification                                                          | 11-20 pM | 9         |
| ICP-MS       | Silver nanoparticles and cation exchange reaction cascade signal amplification | 16 fM    | This work |

**Table S4** Comparison of LODs with other methods for the detection of CEA

| Method                   | Assay strategy                                                                                          | LOD                       | Reference |
|--------------------------|---------------------------------------------------------------------------------------------------------|---------------------------|-----------|
| Colorimetric             | Salt-induced AuNPs aggregation                                                                          | 3 ng mL <sup>-1</sup>     | 10        |
| Fluorescent              | Upconversion fluorescence resonance energy transfer                                                     | 10.7 pg mL <sup>-1</sup>  | 11        |
| Electrochemiluminescence | Ratiometric ECL based on single luminophore                                                             | 34.58 fg mL <sup>-1</sup> | 12        |
| SP-ICPMS                 | RecJ <sub>f</sub> exonuclease-assisted target recycling amplification+HCR+DNA-templated Au nanoclusters | 0.5 pg mL <sup>-1</sup>   | 13        |
| SP-ICPMS                 | ZnSe quantum dots as labels                                                                             | 0.006 ng mL <sup>-1</sup> | 14        |
| ICP-MS                   | Lanthanide nanoparticles as labels                                                                      | 9.2 pg mL <sup>-1</sup>   | 15        |
| ICP-MS                   | Silver nanoparticles and cation exchange reaction cascade signal amplification                          | 26 fg mL <sup>-1</sup>    | This work |

## References

- 1 P. Jarujamrus, M. Amatatongchai, A. Thima, T. Khongrangdee and C. Mongkontong, *Spectrochim. Acta, Part A*, 2015, **142**, 86-93.
- 2 S. I. Raj and A. Jaiswal, *J. Photochem. Photobiol., A*, 2021, **410**, 113158.
- 3 S. V. Hamidi and J. Perreault, *Talanta*, 2019, **201**, 419-425.
- 4 E. Xiong, D. Zhen and L. Jiang, *Chem. Commun.*, 2018, **54**, 12594-12597.
- 5 Y. Chen, H. T. T. Duong, S. Wen, C. Mi, Y. Zhou, O. Shimoni, S. M. Valenzuela and D. Jin, *Anal. Chem.*, 2018, **90**, 663-668.
- 6 P. Hu, X. Wang, L. Wei, R. Dai, X. Yuan, K. Huang and P. Chen, *J. Mater. Chem. B*, 2019, **7**, 4778-4783.
- 7 B. R. Li, H. Tang, R. Q. Yu and J. H. Jiang, *Anal. Chem.*, 2020, **92**, 2379-2382.
- 8 R. Liu, C. Wang, Y. Xu, J. Hu, D. Deng and Y. Lv, *Anal. Chem.*, 2017, **89**, 13269-13274.
- 9 Q. Kang, M. He, B. Chen, G. Xiao and B. Hu, *Anal. Chem.*, 2021, **93**, 737-744.
- 10 C. Luo, W. Wen, F. Lin, X. Zhang, H. Gu and S. Wang, *RSC Adv.*, 2015, **5**, 10994-10999.
- 11 Y. Wang, Z. Wei, X. Luo, Q. Wan, R. Qiu and S. Wang, *Talanta*, 2019, **195**, 33-39.
- 12 L. Shang, X. Wang, W. Zhang, L.-P. Jia, R.-N. Ma, W.-L. Jia and H.-S. Wang, *Sens. Actuators, B*, 2020, **325**, 128776.
- 13 Y. L. Zhu, J. K. Wang, Z. P. Chen, Y. J. Zhao and R. Q. Yu, *Microchim. Acta*, 2022, **190**, 20.
- 14 Y. Cao, G. Mo, J. Feng, X. He, L. Tang, C. Yu and B. Deng, *Anal. Chim. Acta*, 2018, **1028**, 22-31.
- 15 X. Chen, H. Song, Z. Li, R. Liu and Y. Lv, *Anal. Chem.*, 2021, **93**, 13719-13726.
